# Supplementary material for: An electrochemical neutralization energy-assisted membrane-less microfluidic reactor for water electrolysis
Source: Royal Society of Chemistry journal article supplement (doi:10.1039/d0se01474e), 2020-01-01
Supplement: d0se01474e1.pdf [file d0se01474e1.pdf]

# **Electrochemical neutralization energy-assisted membrane-less microfluidic reactor for water electrolysis**

## **SUPPLEMENTARY INFORMATION**

**Biswajit S. De<sup>†‡±</sup>, Aditya Singh<sup>†</sup>, Anastasia Elias<sup>‡</sup>, Neeraj Khare<sup>±</sup>,  
Suddhasatwa Basu<sup>¥±†\*</sup>**

<sup>†</sup> Department of Chemical Engineering, Indian Institute of Technology Delhi Hauz  
Khas, New Delhi, India, 110016.

<sup>¥</sup>CSIR-Institute of Minerals & Materials Technology (IMMT) Sachivalaya Marg, RRL  
Campus, Acharya Vihar, Bhubaneswar, Odisha 751013, India.

<sup>±</sup>Nanoscale Research Facility, Department of Physics, Indian Institute of Technology  
Delhi Hauz Khas, New Delhi, India, 110016.

<sup>‡</sup> Donadeo Innovation Centre for Engineering, Department of Chemical and Materials  
Engineering, University of Alberta, Edmonton, Alberta, Canada, T6G 1H9

\*Corresponding author: [sbasu@iitd.ac.in](mailto:sbasu@iitd.ac.in)

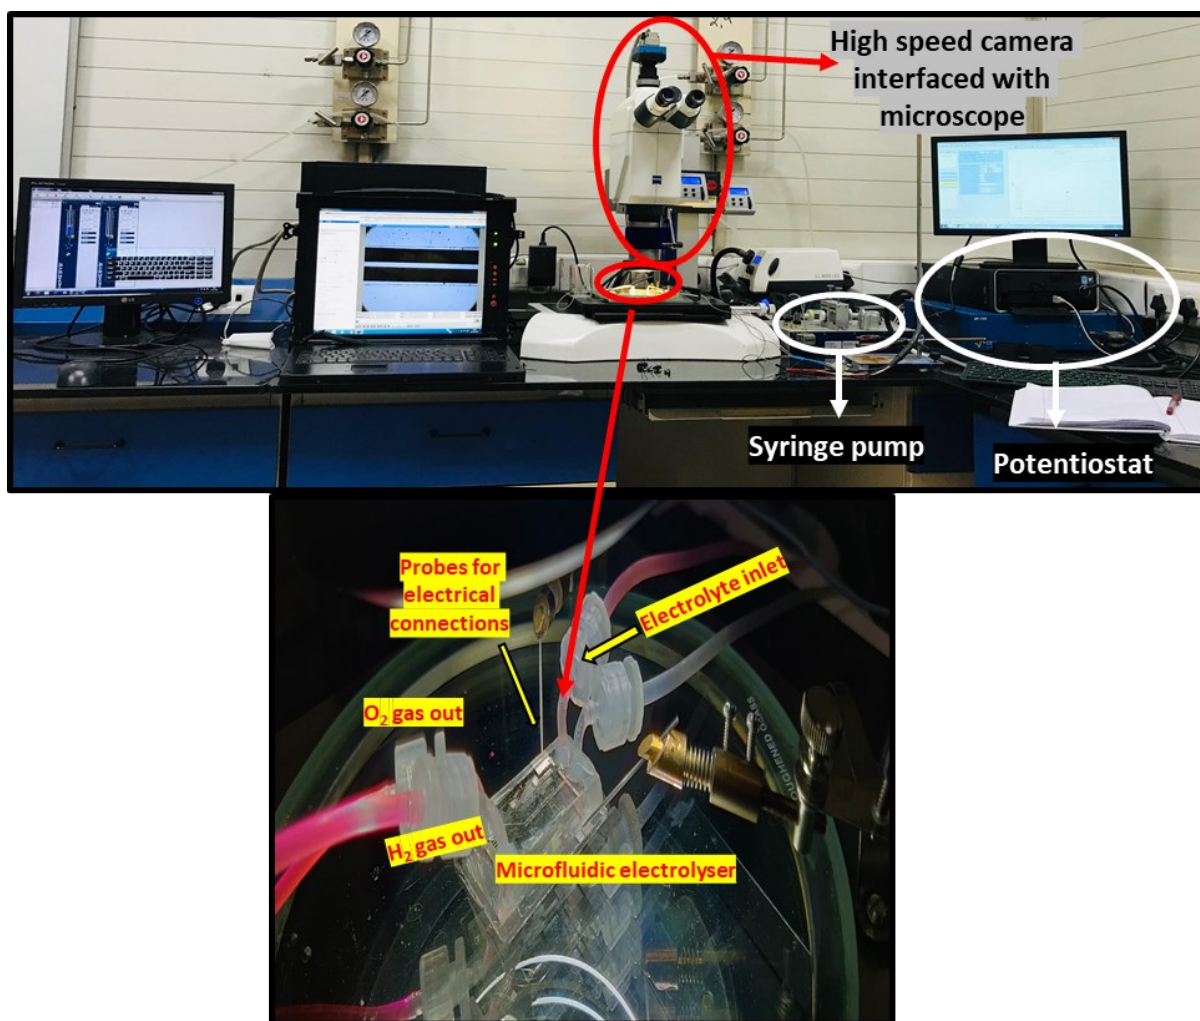

Figure S1: Setup for visual and electrochemical inspection of the microfluidic device.

**Table S1: Values of the dimensionless number estimated for flow characterization in microchannel**

| Flow rate                | At cathode (acidic electrolyte) |       |                          | At anode (alkaline electrolyte) |                          |
|--------------------------|---------------------------------|-------|--------------------------|---------------------------------|--------------------------|
|                          | Fr                              | Re    | Pe (for H <sub>2</sub> ) | Re                              | Pe (for O <sub>2</sub> ) |
| 1.4 ml min <sup>-1</sup> | 6.9                             | 43.94 | 7.29 X 10 <sup>3</sup>   | 48.45                           | 1.75 X 10 <sup>4</sup>   |
| 1.2 ml min <sup>-1</sup> | 5.9                             | 37.66 | 6.25 X 10 <sup>3</sup>   | 41.53                           | 1.50 X 10 <sup>4</sup>   |
| 1.0 ml min <sup>-1</sup> | 4.9                             | 31.38 | 5.21 X 10 <sup>3</sup>   | 34.61                           | 1.25 X 10 <sup>4</sup>   |
| 0.8 ml min <sup>-1</sup> | 3.9                             | 25.10 | 4.17 X 10 <sup>3</sup>   | 27.69                           | 1.00 X 10 <sup>4</sup>   |

**Froude's number:**

$$Fr = \frac{U^2/D_h}{g} = \frac{\text{Inertia force}}{\text{Gravity force}} \quad (\text{S1})$$

$D_h$ : Hydraulic diameter based on channel dimensions, (m)

$U$ : Average velocity, (m s<sup>-1</sup>)

$g$ : Gravitational acceleration constant, (9.81 m s<sup>-2</sup>)

**Reynolds number:**

$$Re = \frac{D_h U}{\vartheta} = \frac{\text{Inertial force}}{\text{Viscous force}} \quad (\text{S2})$$

$\vartheta$ : Kinematic viscosity, (m<sup>2</sup> s<sup>-1</sup>)<sup>1,2</sup>

**Peclet number:**

$$Pe = \frac{UL}{D} = \frac{\text{Convective transport}}{\text{Diffusive transport}} \quad (\text{S3})$$

$L$ : Interelectrode distance (m)

$D$ : Diffusivity (m<sup>2</sup> s<sup>-1</sup>)<sup>3</sup>

**Dependence of OER and HER half-cell potential based on pH following the Nernst equation <sup>4</sup>**

At the cathode (HER):

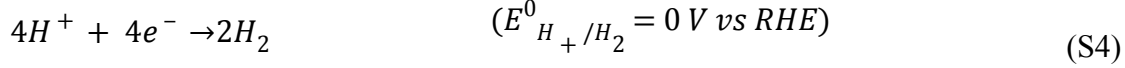

$$E_{HER} = E^0_{H^+/H_2} - 2.303 \frac{RT}{2F} \log \left[ \frac{\alpha_{H_2}}{(\alpha_{H^+})^4} \right] = 0 \text{ V} - 0.059 \times (pH)_{cathode} \quad (S5)$$

At the anode (OER):

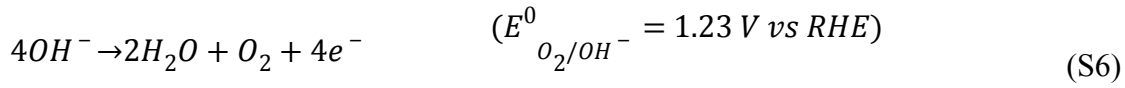

$$E_{OER} = E^0_{O_2/OH^-} - 2.303 \frac{RT}{4F} \log \left[ \frac{(\alpha_{O_2})(\alpha_{H_2O})^2}{(\alpha_{OH^-})^4} \right] = 1.23 - 0.059 \times (pH)_{anode} \quad (S7)$$

Overall water splitting reaction:

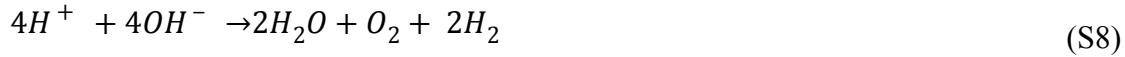

$$E_{theoretical} = E_{OER} - E_{HER} = 1.23 - 0.059 [(pH)_{anode} - (pH)_{cathode}]$$

$$E_{theoretical} = 1.23 - 0.059 \Delta(pH) \quad (S9)$$

where  $E$  is the half-cell potential,  $E^0$  is the standard half-cell potential,  $E_{theoretical}$  is the theoretical potential for water electrolysis,  $\alpha$  is the chemical activity of the species,  $T$  is absolute temperature for the reactor operation,  $R$  is the universal gas constant,  $F$  is the Faraday constant,  $n$  is the number of electrons transferred per  $H_2$ .

## Estimation of electrochemical neutralization energy utilization efficiency for the membrane-less microfluidic reactor for water electrolysis

The higher current density and a drastic reduction in overpotential obtained for asymmetric electrolyte as compared to the acidic or alkaline electrolyte for water electrolysis are contributed by additional energy from electrochemical neutralization. The neutralization reaction is associated with the release of heat <sup>5</sup>:

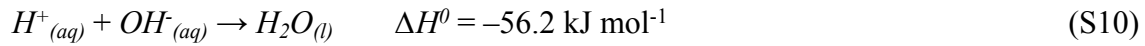

Consider the flow of 1 M NaOH for 1 hour at 1.4 ml min<sup>-1</sup>, total moles of NaOH is 0.084 moles. The total electrochemical neutralization energy associated with 0.084 moles of NaOH is -4720.8 J (-56.2 kJ mol<sup>-1</sup> × 0.084 moles) or 1311 mWh.

Now the power density is calculated for the electrolyzer operating at 10 mA cm<sup>-2</sup> in acidic, alkaline, and asymmetric electrolytes:

Acidic electrolyte: 2.24 V × 10 mA cm<sup>-2</sup> × 0.042 cm<sup>2</sup> = 940.8 mWh

Alkaline electrolyte: 2.22 V × 10 mA cm<sup>-2</sup> × 0.042 cm<sup>2</sup> = 932.4 mWh

Asymmetric electrolyte: 1.58 V × 10 mA cm<sup>-2</sup> × 0.042 cm<sup>2</sup> = 663.6 mWh

If we consider 936.6 mWh as the average power density for electrolyzer operating under acidic or alkaline electrolyte, the difference in power density between the asymmetric electrolyte and acid/alkaline electrolyte is the contribution from electrochemical neutralization realized on the surface of the electrodes, i.e., 273 mWh (936.6 mWh – 663.6 mWh). So, the electrochemical neutralization energy utilization efficiency for water electrolysis in the microfluidic reactor is 20.8% (273 mWh/1311 mWh × 100).

## Cost comparison of the typical state – of – art electrolyzer with the microfluidic electrolyzer based on the number of components

The cost of the typical state – of – art electrolyzer and the microfluidic electrolyzer are subjected to variation based on the raw materials and varying fabrication cost. However, the percent contribution of each components to the overall cost will remain the same as they comprise the vital elements involved in the fabrication of each device.

**Table S2a: Typical state – of – art electrolyzer with components and system cost**

| Components                                     | System Cost |       |
|------------------------------------------------|-------------|-------|
|                                                | USD         | %     |
| Membrane Electrode Assembly (MEA) <sup>1</sup> | 203         | 39.96 |
| Liquid Diffusion Layer <sup>2</sup>            | 116         | 22.83 |
| Gasket <sup>3</sup>                            | 114         | 22.44 |
| Bipolar Flow Plates <sup>4</sup>               | 75          | 14.76 |
| <b>Total</b>                                   | <b>508</b>  |       |

<sup>1</sup> Electrolyzer MEA – 3 Layer, <sup>2</sup> Titanium Frit, <sup>3</sup> Silicone Gasketing, <sup>4</sup> Flex-Stark Bipolar Graphite Plate. The price of the components are adopted from FuelCellStore (<https://www.fuelcellstore.com/>) accessed on 22-08-2020.

**Table S2b<sup>1</sup>: Asymmetric microfluidic electrolyzer with components and system cost**

| Components           | System Cost  |       |
|----------------------|--------------|-------|
|                      | USD          | %     |
| PDMS Microchannel    | 6.5          | 20.40 |
| Patterned Electrodes | 23.4         | 73.46 |
| Tube Fittings        | 1.95         | 6.122 |
| <b>Total</b>         | <b>31.85</b> |       |

<sup>1</sup>The fabrication cost is based on the rate provided by Nanoscale Research Facility, IIT Delhi, where the device was fabricated for research purpose

### Volumetric H<sub>2</sub> and O<sub>2</sub> collection efficiency

The number of moles of the product obtained theoretically is calculated by estimating the charge,  $Q$  (Coulombs) <sup>6</sup>:

$$Q = \int_0^t I \cdot dt = nFN \quad (S11)$$

where  $F$  is the Faraday's constant (96485 C mol<sup>-1</sup>),  $N$  is the moles, and  $n$  is the number of electrons involved in the reaction ( $n = 2$  for HER, and  $n = 4$  for OER). The integration is evaluated by calculating the area under the curve of Fig 7a, which is 11.14 C. Therefore, the theoretical moles of hydrogen and oxygen is calculated as:

$$N_{H_2} = \frac{Q \text{ (area under the curve of Fig 7a)}}{nF} = \frac{11.14}{2 \times 96485} = 5.77 \times 10^{-5} \text{ moles}$$

$$N_{O_2} = \frac{Q \text{ (area under the curve of Fig 7a)}}{nF} = \frac{11.14}{4 \times 96485} = 2.88 \times 10^{-5} \text{ moles}$$

Now, using the above values to the ideal gas law at NTP, the theoretical volume of gas generated is estimated to be:  $V_{H_2} = 1.38$  ml, and  $V_{O_2} = 0.70$  ml for hydrogen and oxygen respectively. Comparing the theoretical volume of gas with the volume obtained by water displacement technique to collect gas products after electrolysis, we evaluate the volumetric collection efficiency as:

$$\text{Volumetric collection efficiency of } H_2 = \frac{\text{Experimental } V_{H_2}}{\text{Theoretical } V_{H_2}} \times 100\% = \frac{1.3 \text{ ml}}{1.38 \text{ ml}} \times 100 = 93.14\%$$

$$\text{Volumetric collection efficiency of } O_2 = \frac{\text{Experimental } V_{O_2}}{\text{Theoretical } V_{O_2}} \times 100\% = \frac{0.64 \text{ ml}}{0.70 \text{ ml}} \times 100 = 91.43\%$$

### Energy conversion efficiency based on the interelectrode distance

The energy conversion efficiency based on a simple electrosynthetic model proposed by Modestino et al. <sup>7</sup> is estimated to rationalize the interelectrode distance of 150  $\mu\text{m}$  for the membrane-less electrolyzer. The fractional device efficiency is calculated as a function of power loss from ionic resistance ( $P_{ion}$ ) and power loss from fluidic resistance ( $P_{fluid}$ ) compared to the chemical energy stored in the products ( $P_{storage}$ ) as <sup>7</sup>:

$$\eta = \frac{P_{storage}}{P_{storage} + P_{ion} + P_{fluid}} \quad (\text{S12})$$

$$P_{storage} = jE^0 \quad (\text{S13})$$

$$P_{ion} = \frac{j^2 dL}{\sigma}, \text{ and} \quad (\text{S14})$$

$$P_{fluid} = \frac{12 \mu Q^2 L}{d^3} \quad (\text{S15})$$

where  $d$  is the interelectrode distance,  $L$  is the length of reactor,  $\mu$  is the viscosity of liquid electrolyte, and  $Q$  is the areal flow rate based on the dimension of the channel. The energy conversion efficiency is estimated to be 96.5% for the microfluidic reactor in asymmetric electrolyte operating at a current density of 23.3  $\text{mA cm}^{-2}$  corresponding to 1.8 V (from Fig 4a) and 1.4  $\text{ml min}^{-1}$  flow rate.



### Calculation of conductivity for 0.5M H<sub>2</sub>SO<sub>4</sub> and 1M NaOH based on the mobility of ions:

The conductivity is estimated based on the ionic mobilities using the following equation <sup>6</sup>:

$$\sigma_i = (|z_i|F)c_i u_i \quad (S16)$$

where  $\sigma_i$  is the conductivity,  $z_i$  is the charge number,  $c_i$  is the concentration, and  $u_i$  is the mobility of  $i^{\text{th}}$  species.

#### **For 0.5M H<sub>2</sub>SO<sub>4</sub>**

The mobility of the ions<sup>8</sup> are  $u_{H^+} = 36.23 \times 10^{-4} \text{ cm}^2/\text{V s}$ , and  $u_{SO_4^{2-}} = 8.29 \times 10^{-4} \text{ cm}^2/\text{V s}$ ,

and  $c_{H^+} = 10^{-3} \text{ mol cm}^{-3}$ , and  $c_{SO_4^{2-}} = 0.5 \times 10^{-3} \text{ mol cm}^{-3}$ , and  $z_{H^+} = +1$ , and  $z_{SO_4^{2-}} = -2$ .

Substituting the values in Equation S16:

$$\sigma_{H^+} = 0.17 \Omega^{-1} \text{ cm}^{-1}, \text{ and } \sigma_{SO_4^{2-}} = 0.08 \Omega^{-1} \text{ cm}^{-1}$$

$$\sigma_{H_2SO_4} = \sigma_{H^+} + \sigma_{SO_4^{2-}} = 0.25 \Omega^{-1} \text{ cm}^{-1}$$

#### **For 1M NaOH**

The mobility of the ions<sup>8</sup> are  $u_{Na^+} = 5.19 \times 10^{-4} \text{ cm}^2/\text{V s}$ , and  $u_{OH^-} = 2.05 \times 10^{-3} \text{ cm}^2/\text{V s}$ ,

$c_{Na^+} = 10^{-3} \text{ mol cm}^{-3}$  and  $c_{OH^-} = 10^{-3} \text{ mol cm}^{-3}$ , and  $z_{Na^+} = +1$ , and  $z_{OH^-} = -1$  Substituting the

values in Equation S16:

$$\sigma_{Na^+} = 0.05 \Omega^{-1} \text{ cm}^{-1}, \text{ and } \sigma_{OH^-} = 0.19 \Omega^{-1} \text{ cm}^{-1}$$

$$\sigma_{NaOH} = \sigma_{Na^+} + \sigma_{OH^-} = 0.24 \Omega^{-1} \text{ cm}^{-1}$$

## References

- 1 S. D. Sheet, 2017, **77**, 1–8.
- 2 LabChem, 2018, **77**, 1–8.
- 3 D. L. Wise and G. Houghton, *Chem. Eng. Sci.*, 1966, **21**, 999–1010.
- 4 S. Trasatti, *Pure Appl. Chem.*, 1986, **58**, 955–966.
- 5 J. Barrett, *Inorganic chemistry in aqueous solution*, Royal Society of Chemistry, 2003, vol. 21.
- 6 R. O'hayre, S.-W. Cha, F. B. Prinz and W. Colella, *Fuel cell fundamentals*, John Wiley & Sons, 2016.
- 7 M. A. Modestino, D. Fernandez Rivas, S. M. H. Hashemi, J. G. E. Gardeniers and D. Psaltis, *Energy Environ. Sci.*, 2016, **9**, 3381–3391.
- 8 P. W. Atkins, J. De Paula and J. Keeler, *Atkin's Physical Chemistry*, W.H. Freeman and Company, New York, First Edition.
